# Supplementary material for: Depression Classification Using Frequent Subgraph Mining Based on Pattern Growth of Frequent Edge in Functional Magnetic Resonance Imaging Uncertain Network
Source: Frontiers journal article supplement (doi:10.3389/fnins.2022.889105), 2022-04-29
Supplement: Image_2.pdf [file Image_2.pdf]

**Supplemental Figure S2. Spatial maps of the 22 components identified as intrinsic connection network (ICNs).**

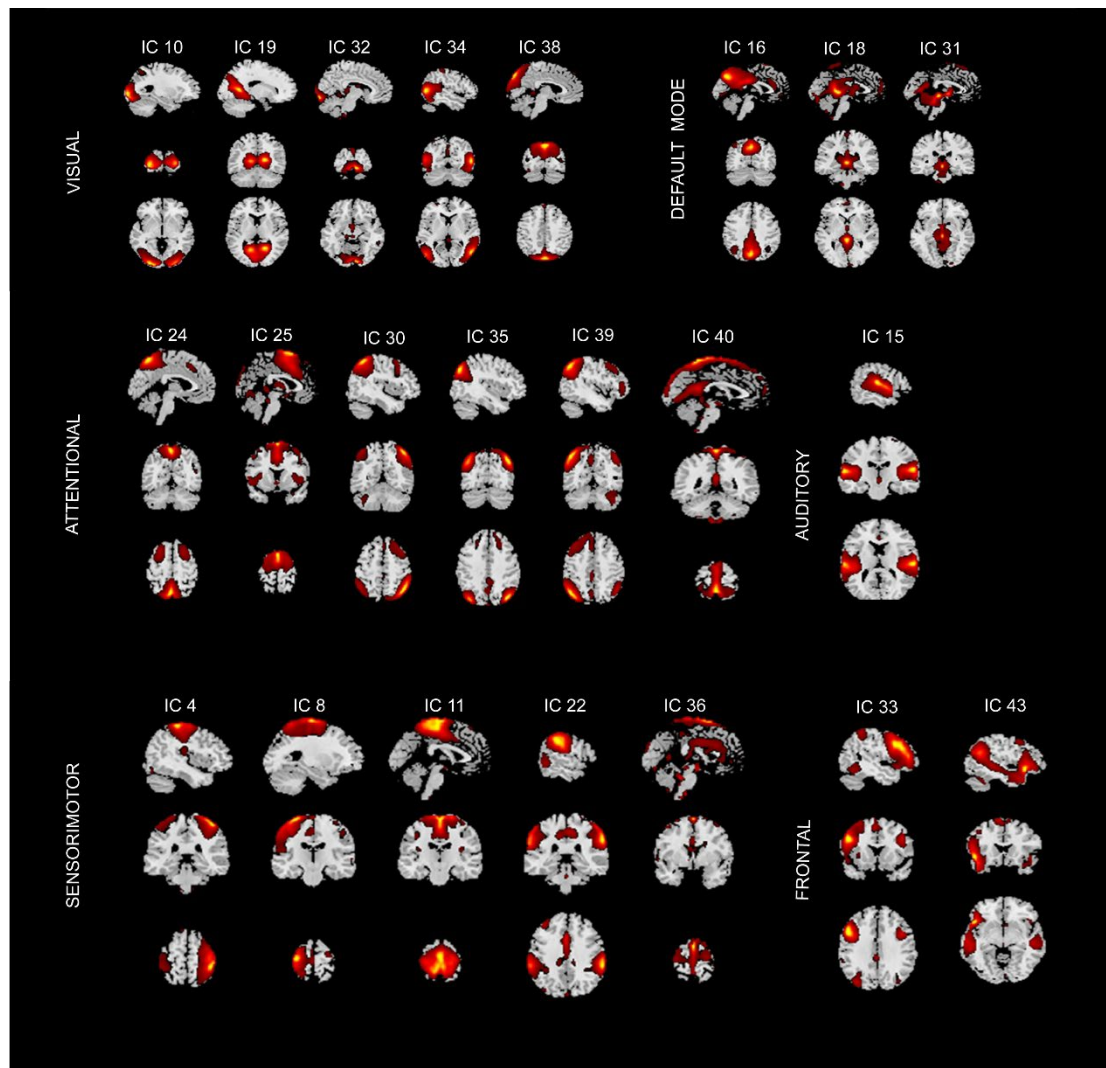

**Fig. S2. Illustrates Spatial maps of the 22 components identified as ICNs.** Spatial maps are plotted for the three most informative slices as  $t$ -statistics. ICNs are divided into groups based on their anatomical and functional properties within each of the following networks: AUD, SM, VIS, DMN, ATTN, and FRONT. AUD, auditory network; SM, sensorimotor network; VIS, visual network; DMN, default mode network; ATTN, attentional network; FRONT, frontal network.
